# Supplementary material
Source: PubMed Central journal article supplement (PMC2577266)
Supplement: pp.108.126375_1.pdf [file pp.108.126375_1.pdf]

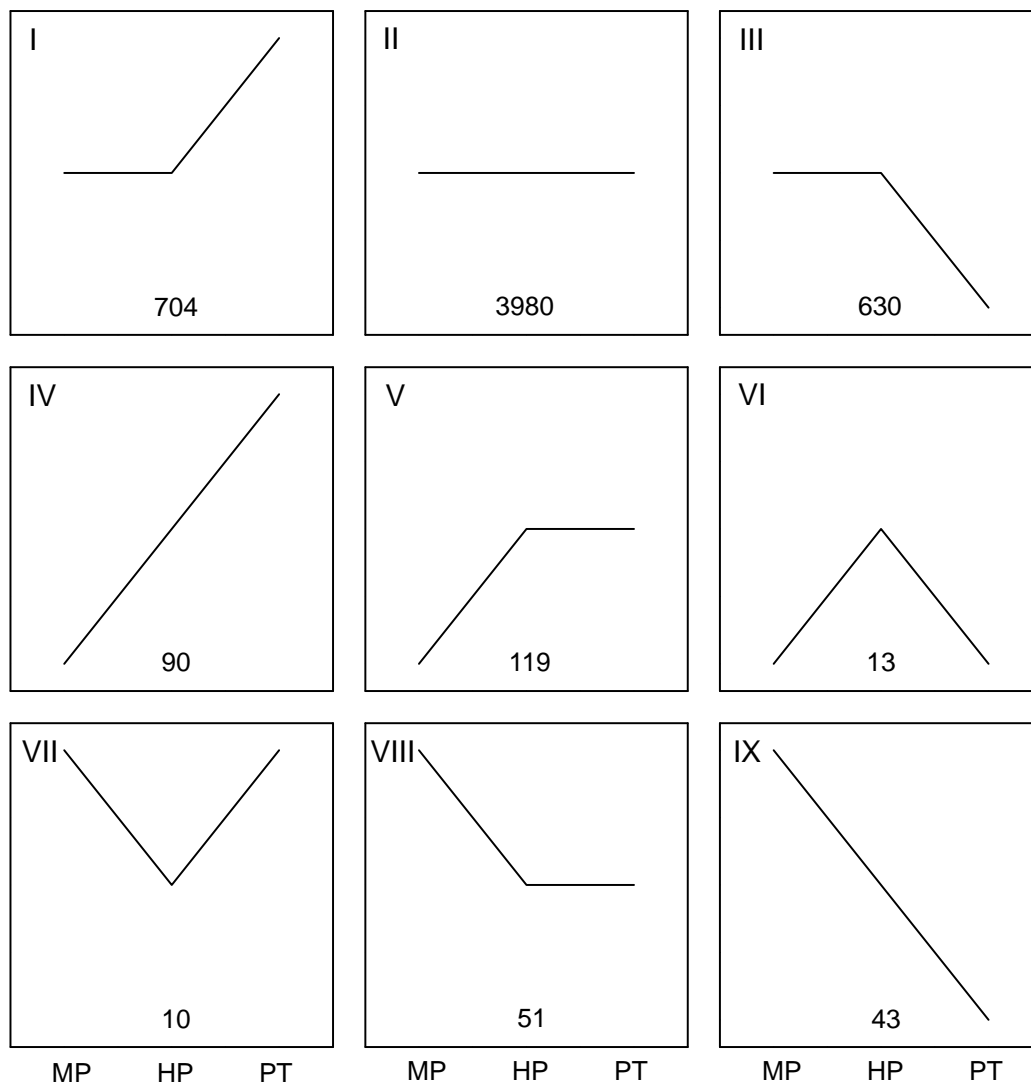

**Figure S1. Cluster analysis of the expressed genes during PG and PTG.**

All the 5,640 detected genes were distributed into 9 clusters (I-IX) according to their expression profiles. The number of the genes in each cluster was indicated below. The detailed gene information of all 9 clusters was summarized in Table S3.
