# Supplementary material
Source: PubMed Central journal article supplement (PMC2577266)
Supplement: pp.108.126375_2.pdf [file pp.108.126375_2.pdf]

## Pollen Germination

A

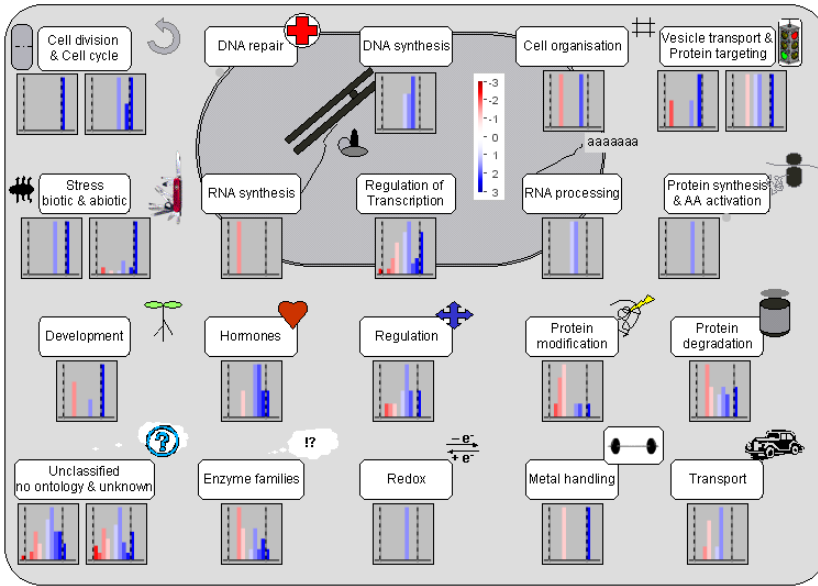

## Pollen Tube Growth

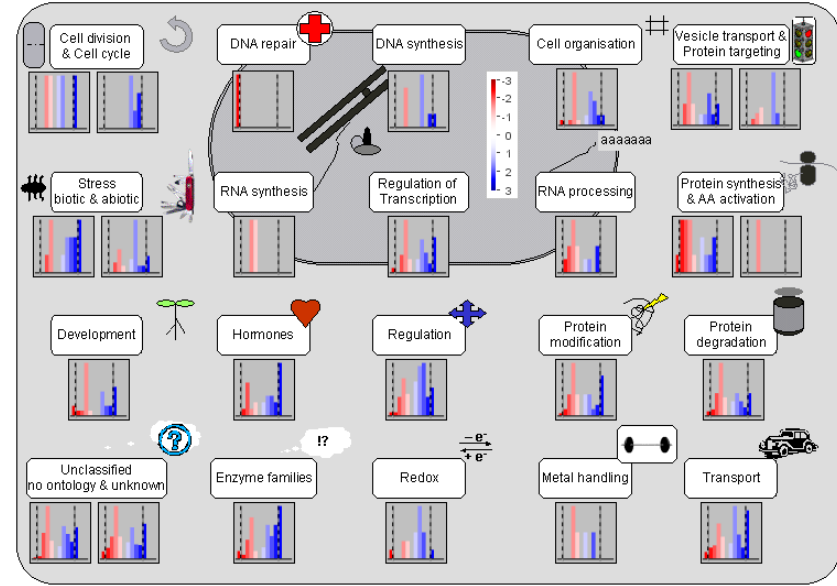

B

## Cell function overview

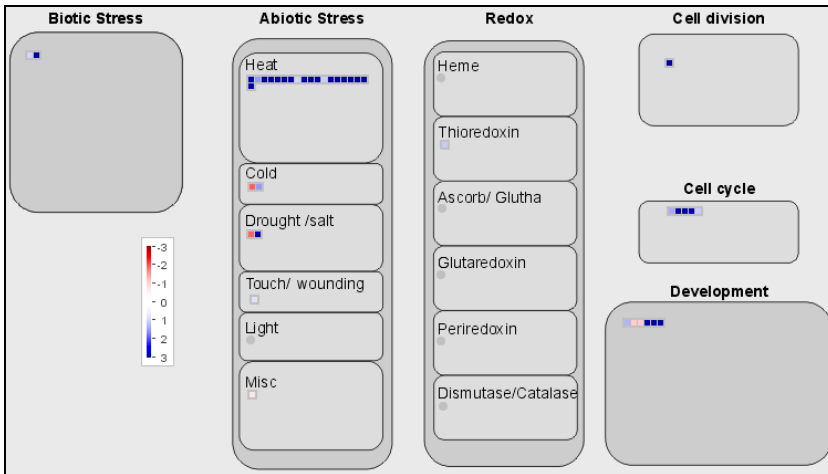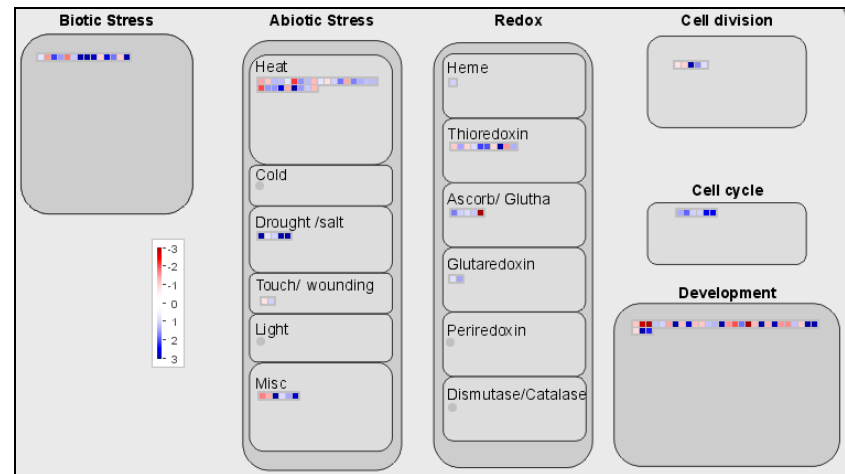

## Cellular response overview

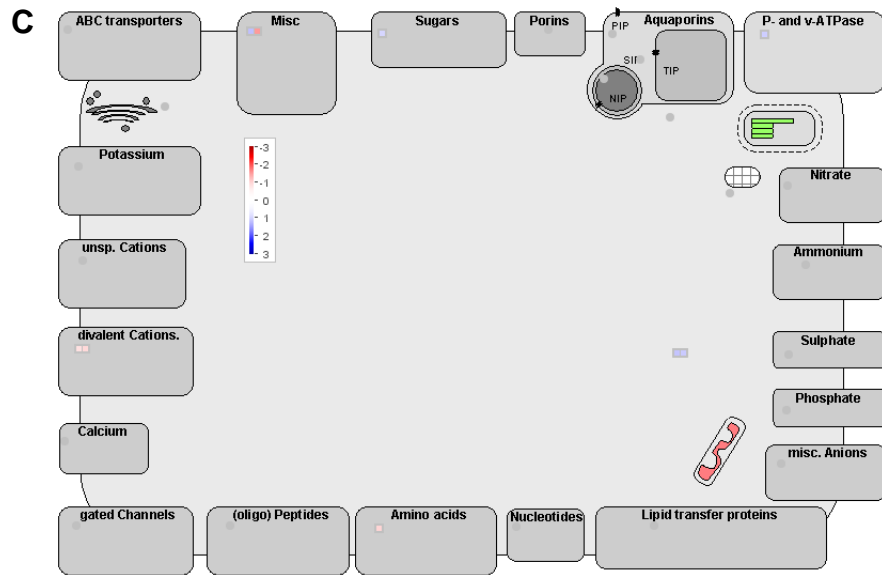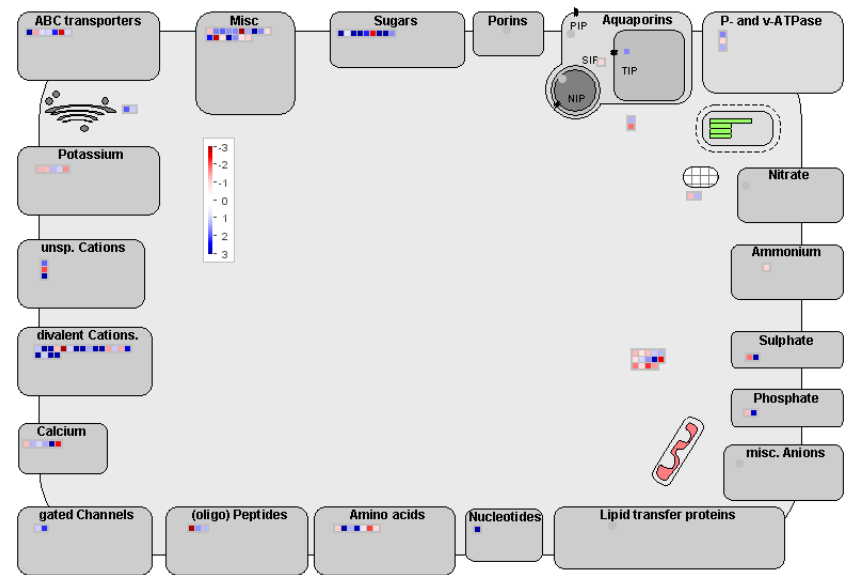

Transport overview

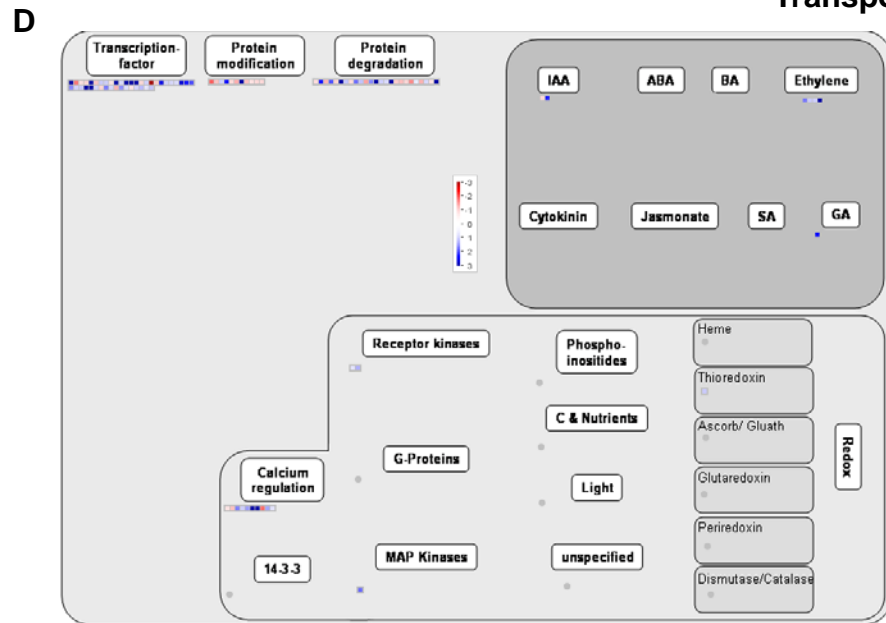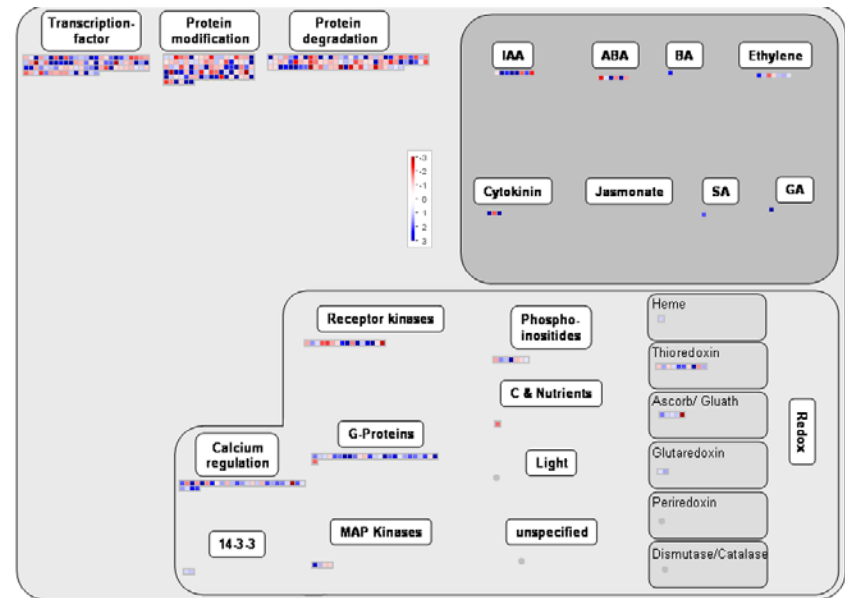

Regulation overview

E

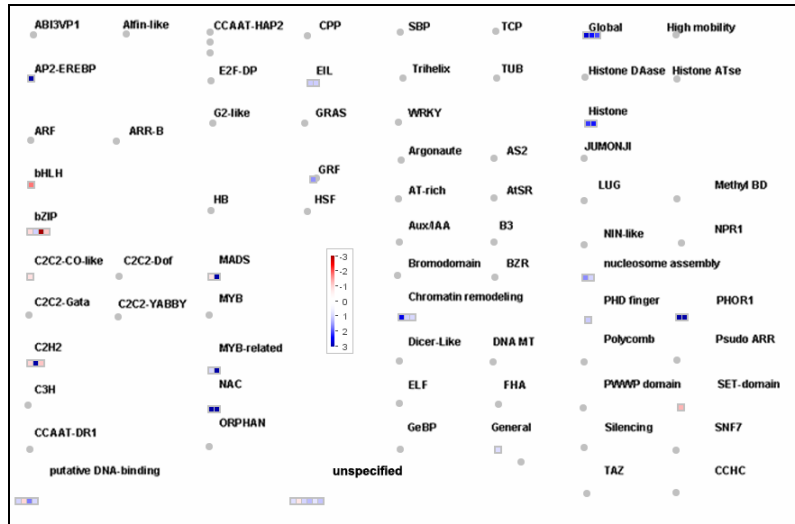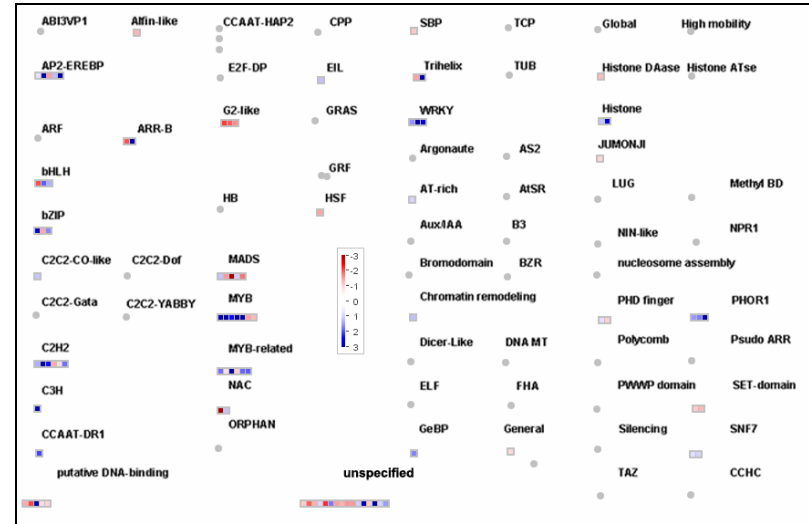

Transcription overview

F

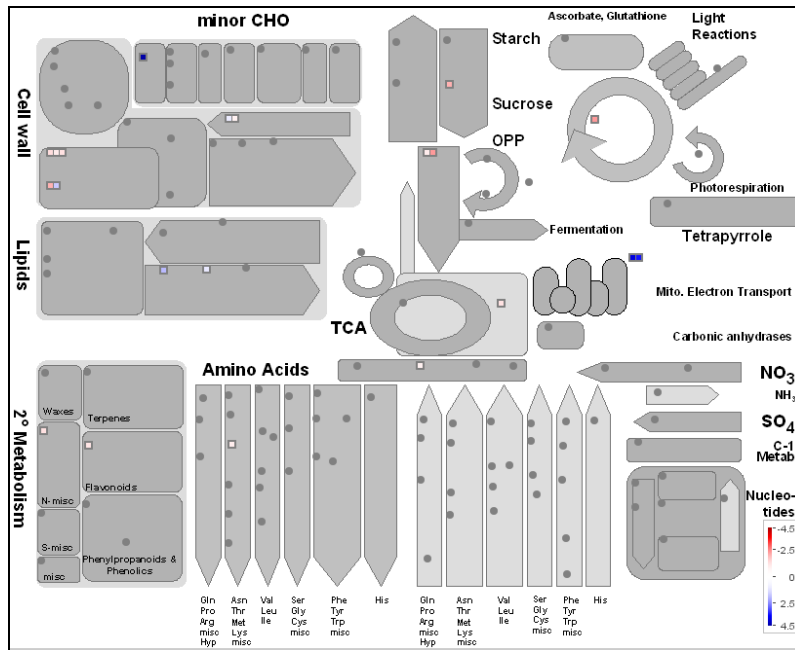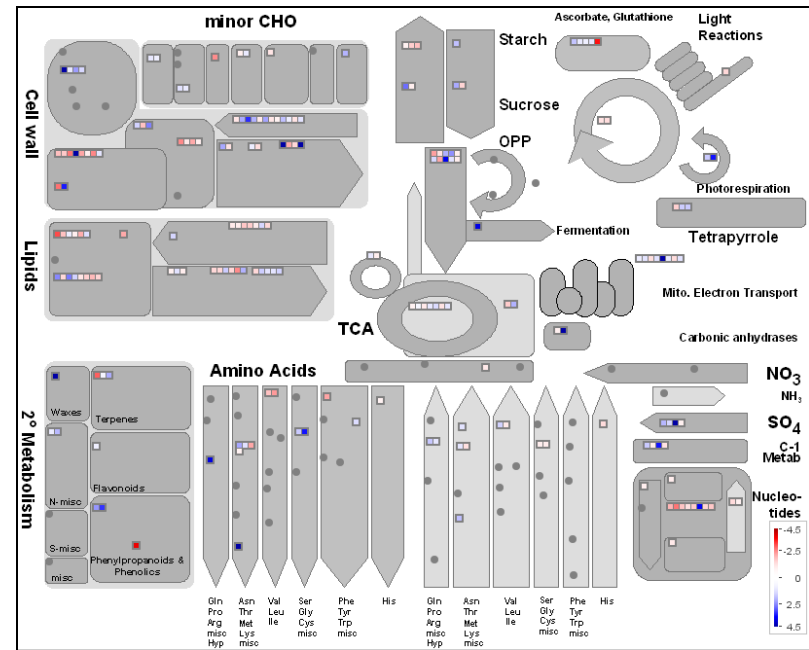

Metabolism overview

**Figure S2. The difference analysis of changed genes between pollen germination and pollen tube growth using MAPMAN software.**

The distinctions of changed genes between pollen germination (left panel) and pollen tube growth (right panel) were shown on the diagrams. The overview display of genes assigned to cell function (A), cellular response (B), transport (C), regulation (D), transcription (E) and metabolism (F) were represented respectively. In diagram A, the distributions of changed genes according to their degrees in main cell functional categories were displayed by using histogram. The color of the bars indicated the change degree of gene expression level; red and blue represented a decrease (a series red bars on the left side) and increase (a series blue bars on the right side) respectively. The scale value of the color was set to 3. In diagrams B to F, all the changed genes were shown in their corresponding functional categories. A pane in the diagram represented one gene, the color of which indicated the change degree of expression level. The detailed definition of MAPMAN software is provided at <http://gabi.rzpd.de/projects/MapMan/>.
