# Supplementary material
Source: PubMed Central journal article supplement (PMC2577266)
Supplement: pp.108.126375_3.pdf [file pp.108.126375_3.pdf]

## **SUPPLEMENTAL MATERIAL**

**Table S1:** Genes with detectable expression during PG and PTG.

**Table S2:** Genes with altered transcription (up- or down-regulated more than 1.6-fold) during PG and PTG.

**Table S3:** Cluster analysis results of the expressed genes during PG and PTG.

**Table S4:** Results of functional category and gene family analysis of genes with altered expression levels during PG and PTG.

**Table S5:** MAPMAN analysis of genes with altered expression levels during PG and PTG.

**Table S6:** Expressed genes in the CaM/CML, CHX and Hsp gene families.

**Table S7:** Transcriptionally up-regulated genes of the CaM/CML, CHX and Hsp families during PG and PTG.

**Table S8:** Sequences of the specific primers for the genes tested in real-time PCR experiments.

**Figure S1:** Cluster analysis of the expressed genes during PG and PTG.

**Figure S2:** MAPMAN analysis of the difference in transcription between PG and PTG.
